# Supplementary material for: Association of angiogenesis and inflammation-related gene functional polymorphisms with early-stage breast cancer prognosis
Source: PubMed Central journal article supplement — Oncol Lett. 2020 Apr 7;19(6):3687–700. doi: 10.3892/ol.2020.11521 (PMC7204491; doi:10.3892/ol.2020.11521), 2020-04-07
Supplement: Supplementary_Data.pdf [file Supplementary_Data.pdf]

Table S1. Association between IL-6 polymorphisms in allele and genotype models and clinicopathological features.

| Parameter                    | IL-6 rs1800795        |                    |                       |                   |         |                |                    |    |                       |                   | IL-6 rs1800797        |                   |                  |    |    |                    |    |  |  |  |
|------------------------------|-----------------------|--------------------|-----------------------|-------------------|---------|----------------|--------------------|----|-----------------------|-------------------|-----------------------|-------------------|------------------|----|----|--------------------|----|--|--|--|
|                              | Allelic model         |                    |                       |                   |         | Genotype model |                    |    |                       |                   | Allelic model         |                   |                  |    |    | Genotype model     |    |  |  |  |
|                              | C allele non carriers | C allele carriers  | G allele non carriers | G allele carriers | P-value | CC             | GC                 | GG | A allele non carriers | A allele carriers | G allele non carriers | G allele carriers | AA               | GA | GG | P-value            |    |  |  |  |
| Age at diagnosis, years      |                       |                    |                       |                   |         |                |                    |    |                       |                   |                       |                   |                  |    |    |                    |    |  |  |  |
| <50                          | 41                    | 99                 | 34                    | 106               |         | 34             | 65                 | 41 |                       | 41                | 99                    | 37                | 103              |    | 37 | 62                 | 41 |  |  |  |
| ≥50                          | 24                    | 38                 | 15                    | 47                |         | 15             | 23                 | 24 |                       | 20                | 42                    | 15                | 47               |    | 15 | 27                 | 20 |  |  |  |
| OR (95% CI)                  | 1                     | 1.53 (0.81-2.86)   | 1                     | 0.99 (0.49-1.99)  |         | 1              | 0.99 (0.49-1.99)   |    |                       | 1                 | 1.15 (0.60-2.19)      | 1                 | 0.89 (0.45-1.78) |    | 1  | 0.89 (0.45-1.78)   |    |  |  |  |
| P-value                      |                       | 0.194              |                       | 1.000             |         |                | 0.363              |    |                       |                   | 0.392                 |                   | 0.862            |    |    | 0.924              |    |  |  |  |
| Tumour size, cm              |                       |                    |                       |                   |         |                |                    |    |                       |                   |                       |                   |                  |    |    |                    |    |  |  |  |
| <2                           | 41                    | 89                 | 29                    | 101               |         | 29             | 60                 | 41 |                       | 38                | 92                    | 32                | 98               |    | 32 | 60                 | 38 |  |  |  |
| 2-5                          | 24                    | 48                 | 20                    | 52                |         | 20             | 28                 | 24 |                       | 23                | 49                    | 20                | 52               |    | 20 | 29                 | 23 |  |  |  |
| OR (95% CI)                  | 1                     | 1.09 (0.59-2.01)   | 1                     | 1.34 (0.69-2.59)  |         | 1              | 1.34 (0.69-2.59)   |    |                       | 1                 | 1.14 (0.61-2.12)      | 1                 | 1.18 (0.61-2.26) |    | 1  | 1.18 (0.61-2.26)   |    |  |  |  |
| P-value                      |                       | 0.887              |                       | 0.393             |         |                | 0.554              |    |                       |                   | 0.750                 |                   | 0.619            |    |    | 0.745              |    |  |  |  |
| Lymph node status            |                       |                    |                       |                   |         |                |                    |    |                       |                   |                       |                   |                  |    |    |                    |    |  |  |  |
| Negative                     | 39                    | 83                 | 29                    | 93                |         | 29             | 54                 | 39 |                       | 34                | 88                    | 33                | 89               |    | 33 | 55                 | 34 |  |  |  |
| Positive                     | 26                    | 54                 | 20                    | 60                |         | 20             | 34                 | 26 |                       | 27                | 53                    | 19                | 61               |    | 19 | 34                 | 27 |  |  |  |
| OR (95% CI)                  | 1                     | 1.03 (0.56-1.87)   | 1                     | 1.07 (0.56-2.06)  |         | 1              | 1.07 (0.56-2.06)   |    |                       | 1                 | 1.32 (0.72-2.43)      | 1                 | 0.84 (0.44-1.61) |    | 1  | 0.84 (0.44-1.61)   |    |  |  |  |
| P-value                      |                       | 1.000              |                       | 0.498             |         |                | 0.965              |    |                       |                   | 0.434                 |                   | 0.626            |    |    | 0.665              |    |  |  |  |
| Differentiation grade        |                       |                    |                       |                   |         |                |                    |    |                       |                   |                       |                   |                  |    |    |                    |    |  |  |  |
| G1+G2                        | 50                    | 107                | 39                    | 118               |         | 39             | 68                 | 50 |                       | 46                | 111                   | 40                | 117              |    | 40 | 71                 | 46 |  |  |  |
| G3                           | 15                    | 29                 | 10                    | 34                |         | 10             | 19                 | 15 |                       | 15                | 29                    | 12                | 32               |    | 12 | 17                 | 15 |  |  |  |
| OR (95% CI)                  | 1                     | 1.11 (0.55-2.25)   | 1                     | 0.89 (0.40-1.97)  |         | 1              | 0.89 (0.40-1.97)   |    |                       | 1                 | 1.25 (0.61-2.54)      | 1                 | 1.10 (0.52-2.33) |    | 1  | 1.10 (0.52-2.33)   |    |  |  |  |
| P-value                      |                       | 0.862              |                       | 0.857             |         |                | 0.976              |    |                       |                   | 0.580                 |                   | 0.846            |    |    | 0.743              |    |  |  |  |
| Estrogen receptor status     |                       |                    |                       |                   |         |                |                    |    |                       |                   |                       |                   |                  |    |    |                    |    |  |  |  |
| Positive                     | 38                    | 100                | 32                    | 106               |         | 32             | 68                 | 38 |                       | 34                | 104                   | 38                | 100              |    | 38 | 71                 | 34 |  |  |  |
| Negative                     | 27                    | 37                 | 17                    | 47                |         | 17             | 20                 | 27 |                       | 27                | 37                    | 27                | 37               |    | 27 | 18                 | 27 |  |  |  |
| OR (95% CI)                  | 1                     | 1.92 (1.04-3.57)   | 1                     | 1.19 (0.61-2.37)  |         | 1              | 1.19 (0.61-2.37)   |    |                       | 1                 | 2.23 (1.19-4.08)      | 1                 | 1.09 (0.52-2.33) |    | 1  | 1.09 (0.52-2.33)   |    |  |  |  |
| P-value                      |                       | 0.040 <sup>a</sup> |                       | 0.361             |         |                | 0.038 <sup>a</sup> |    |                       |                   | 0.014 <sup>a</sup>    |                   | 0.846            |    |    | 0.005 <sup>a</sup> |    |  |  |  |
| Progesterone receptor status |                       |                    |                       |                   |         |                |                    |    |                       |                   |                       |                   |                  |    |    |                    |    |  |  |  |
| Positive                     | 37                    | 84                 | 24                    | 97                |         | 24             | 60                 | 37 |                       | 32                | 89                    | 25                | 96               |    | 25 | 64                 | 32 |  |  |  |
| Negative                     | 28                    | 53                 | 25                    | 56                |         | 25             | 28                 | 28 |                       | 29                | 52                    | 27                | 54               |    | 27 | 25                 | 29 |  |  |  |
| OR (95% CI)                  | 1                     | 1.20 (0.66-2.18)   | 1                     | 1.80 (0.94-3.46)  |         | 1              | 1.80 (0.94-3.46)   |    |                       | 1                 | 1.55 (0.85-2.85)      | 1                 | 1.92 (1.01-3.63) |    | 1  | 1.92 (1.01-3.63)   |    |  |  |  |
| P-value                      |                       | 0.654              |                       | 0.092             |         |                | 0.071              |    |                       |                   | 0.161                 |                   | 0.050            |    |    | 0.007 <sup>a</sup> |    |  |  |  |

Table SI. Continued.

| Parameter                                       | <i>IL-6</i> rs1800795 |                   |                       |                   |    |                  | <i>IL-6</i> rs1800797 |                       |                    |                       |                   |    |                  |       |
|-------------------------------------------------|-----------------------|-------------------|-----------------------|-------------------|----|------------------|-----------------------|-----------------------|--------------------|-----------------------|-------------------|----|------------------|-------|
|                                                 | Allelic model         |                   |                       | Genotype model    |    |                  | Allelic model         |                       |                    | Genotype model        |                   |    |                  |       |
|                                                 | C allele non carriers | C allele carriers | G allele non carriers | G allele carriers | CC | GC               | GG                    | A allele non carriers | A allele carriers  | G allele non carriers | G allele carriers | AA | GA               | GG    |
| Human epidermal growth factor receptor 2 status |                       |                   |                       |                   |    |                  |                       |                       |                    |                       |                   |    |                  |       |
| Negative                                        | 48                    | 116               | 42                    | 122               | 42 | 74               | 48                    | 44                    | 120                | 45                    | 119               | 45 | 75               | 44    |
| Positive                                        | 17                    | 21                | 7                     | 31                | 7  | 14               | 17                    | 17                    | 21                 | 7                     | 31                | 7  | 14               | 17    |
| OR (95% CI)                                     | 1                     | 1.96 (0.95-4.03)  | 1                     | 0.66 (0.27-1.60)  | 1  | 2.21 (1.07-4.57) | 1                     | 2.21 (1.07-4.57)      | 0.042 <sup>a</sup> | 1                     | 0.59 (0.25-1.45)  | 1  | 0.59 (0.25-1.45) | 0.105 |
| P-value                                         |                       | 0.083             |                       | 0.401             |    | 0.194            |                       |                       |                    |                       | 0.307             |    |                  |       |

<sup>a</sup>Significant. OR, odds ratio.

Table SII. Association between IL-6 polymorphisms in haplotype and diplotype models and clinicopathologic features.

| Parameter                                       | Haplotype model          |                       |                           |                       | Diplotype model    |       |       |
|-------------------------------------------------|--------------------------|-----------------------|---------------------------|-----------------------|--------------------|-------|-------|
|                                                 | GG haplotype noncarriers | GG haplotype carriers | AC haplotype non carriers | AC haplotype carriers | AC/AC              | GG/AC | GG/GG |
| Age at diagnosis, years                         |                          |                       |                           |                       |                    |       |       |
| <50                                             | 38                       | 102                   | 42                        | 98                    | 34                 | 58    | 43    |
| ≥50                                             | 17                       | 45                    | 24                        | 38                    | 14                 | 22    | 20    |
| OR (95% CI)                                     | 1                        | 1.01 (0.52-1.98)      | 1                         | 1.48 (0.79-2.75)      |                    |       |       |
| P-value                                         |                          | >0.999                |                           | 0.256                 | 0.825              |       |       |
| Tumour size, cm                                 |                          |                       |                           |                       |                    |       |       |
| <2                                              | 34                       | 96                    | 41                        | 89                    | 29                 | 54    | 41    |
| 2-5                                             | 21                       | 51                    | 25                        | 47                    | 19                 | 26    | 22    |
| OR (95% CI)                                     | 1                        | 1.16 (0.61-2.21)      | 1                         | 1.16 (0.63-2.13)      |                    |       |       |
| P-value                                         |                          | 0.742                 |                           | 0.642                 | 0.718              |       |       |
| Lymph node status                               |                          |                       |                           |                       |                    |       |       |
| negative                                        | 35                       | 87                    | 39                        | 83                    | 29                 | 48    | 36    |
| positive                                        | 20                       | 60                    | 27                        | 53                    | 19                 | 32    | 27    |
| OR (95% CI)                                     | 1                        | 0.83 (0.44-1.57)      | 1                         | 1.08 (0.59-1.98)      |                    |       |       |
| P-value                                         |                          | 0.629                 |                           | 0.878                 | 0.929              |       |       |
| Differentiation grade                           |                          |                       |                           |                       |                    |       |       |
| G1+G2                                           | 43                       | 114                   | 51                        | 106                   | 38                 | 62    | 48    |
| G3                                              | 12                       | 32                    | 15                        | 29                    | 10                 | 17    | 15    |
| OR (95% CI)                                     | 1                        | 0.99 (0.46-2.11)      | 1                         | 1.08 (0.53-2.18)      |                    |       |       |
| P-value                                         |                          | >0.999                |                           | 0.857                 | 0.926              |       |       |
| Estrogen receptor status                        |                          |                       |                           |                       |                    |       |       |
| Positive                                        | 36                       | 102                   | 35                        | 102                   | 31                 | 62    | 36    |
| Negative                                        | 19                       | 45                    | 27                        | 37                    | 17                 | 18    | 27    |
| OR (95% CI)                                     | 1                        | 1.20 (0.62-2.31)      | 1                         | 2.13 (1.14-3.98)      |                    |       |       |
| P-value                                         |                          | 0.355                 |                           | 0.018 <sup>a</sup>    | 0.028 <sup>a</sup> |       |       |
| Progesterone receptor status                    |                          |                       |                           |                       |                    |       |       |
| Positive                                        | 28                       | 93                    | 37                        | 84                    | 23                 | 55    | 35    |
| Negative                                        | 27                       | 54                    | 29                        | 52                    | 25                 | 25    | 28    |
| OR (95% CI)                                     | 1                        | 1.66 (0.89-3.11)      | 1                         | 1.27 (0.69-2.29)      |                    |       |       |
| P-value                                         |                          | 0.146                 |                           | 0.448                 | 0.052              |       |       |
| Human epidermal growth factor receptor 2 status |                          |                       |                           |                       |                    |       |       |
| Negative                                        | 47                       | 117                   | 48                        | 114                   | 41                 | 68    | 46    |
| Positive                                        | 8                        | 30                    | 18                        | 22                    | 7                  | 12    | 17    |
| OR (95% CI)                                     | 1                        | 0.66 (0.28-1.55)      | 1                         | 1.94 (0.94-4.44)      |                    |       |       |
| P-value                                         |                          | 0.230                 |                           | 0.095                 | 0.155              |       |       |

<sup>a</sup>Significant. OR, odds ratio.

Table SIII. Associations between *IL-1α* rs1800587 polymorphism and clinicopathological features.

| Parameter                                       | Allelic model         |                    |                       |                   | Genotype model     |    |    |
|-------------------------------------------------|-----------------------|--------------------|-----------------------|-------------------|--------------------|----|----|
|                                                 | G allele non carriers | G allele carriers  | A allele non carriers | A allele carriers | GG                 | GA | AA |
| Age at diagnosis, years                         |                       |                    |                       |                   |                    |    |    |
| <50                                             | 14                    | 126                | 68                    | 72                | 68                 | 58 | 14 |
| ≥50                                             | 4                     | 58                 | 29                    | 33                | 29                 | 29 | 4  |
| OR (95% CI)                                     | 1                     | 0.62 (0.19-1.97)   | 1                     | 0.93 (0.51-1.69)  |                    |    |    |
| P-value                                         |                       | 0.593              |                       | 0.879             | 0.631              |    |    |
| Tumour size, cm                                 |                       |                    |                       |                   |                    |    |    |
| 2-5 cm                                          | 2                     | 70                 | 41                    | 31                | 41                 | 29 | 2  |
| <2                                              | 16                    | 114                | 56                    | 74                | 56                 | 58 | 16 |
| OR (95% CI)                                     | 1                     | 4.91 (1.09-22.01)  | 1                     | 0.57 (0.32-1.02)  |                    |    |    |
| P-value                                         |                       | 0.022 <sup>a</sup> |                       | 0.077             | 0.032 <sup>a</sup> |    |    |
| Lymph node status                               |                       |                    |                       |                   |                    |    |    |
| Negative                                        | 14                    | 108                | 56                    | 66                | 56                 | 52 | 14 |
| Positive                                        | 4                     | 76                 | 41                    | 39                | 41                 | 35 | 4  |
| OR (95% CI)                                     | 1                     | 0.41 (0.13-1.28)   | 1                     | 1.24 (0.70-2.18)  |                    |    |    |
| P-value                                         |                       | 0.135              |                       | 0.475             | 0.252              |    |    |
| Differentiation grade                           |                       |                    |                       |                   |                    |    |    |
| G1+G2                                           | 13                    | 144                | 74                    | 83                | 74                 | 70 | 13 |
| G3                                              | 5                     | 39                 | 23                    | 21                | 23                 | 16 | 5  |
| OR (95% CI)                                     | 1                     | 1.42 (0.48-4.23)   | 1                     | 1.23 (0.63-2.39)  |                    |    |    |
| P-value                                         |                       | 0.553              |                       | 0.610             | 0.579              |    |    |
| Estrogen receptor status                        |                       |                    |                       |                   |                    |    |    |
| Positive                                        | 12                    | 126                | 63                    | 75                | 63                 | 63 | 12 |
| Negative                                        | 6                     | 58                 | 34                    | 30                | 34                 | 24 | 6  |
| OR (95% CI)                                     | 1                     | 1.09 (0.39-3.04)   | 1                     | 1.35 (0.75-2.45)  |                    |    |    |
| P-value                                         |                       | >0.999             |                       | 0.365             | 0.547              |    |    |
| Progesterone receptor status                    |                       |                    |                       |                   |                    |    |    |
| Positive                                        | 12                    | 109                | 55                    | 66                | 55                 | 54 | 12 |
| Negative                                        | 6                     | 75                 | 42                    | 39                | 42                 | 33 | 6  |
| OR (95% CI)                                     | 1                     | 0.73 (0.26-2.02)   | 1                     | 1.29 (0.74-2.27)  |                    |    |    |
| P-value                                         |                       | 0.621              |                       | 0.392             | 0.627              |    |    |
| Human epidermal growth factor receptor 2 status |                       |                    |                       |                   |                    |    |    |
| Negative                                        | 15                    | 149                | 79                    | 85                | 79                 | 70 | 15 |
| Positive                                        | 3                     | 35                 | 18                    | 20                | 18                 | 17 | 3  |
| OR (95% CI)                                     | 1                     | 0.85 (0.23-3.10)   | 1                     | 0.97 (0.48-1.96)  |                    |    |    |
| P-value                                         |                       | >0.999             |                       | >0.999            | 0.956              |    |    |

<sup>a</sup>Significant. OR, odds ratio.

Table SIV. Association between *IL-1β* polymorphisms and clinicopathological features.

| Parameter                    | <i>IL-1β</i> rs1143634 |                   |                       |                  |    |       | <i>IL-1β</i> rs16944 |                   |                       |                  |    |    |       |
|------------------------------|------------------------|-------------------|-----------------------|------------------|----|-------|----------------------|-------------------|-----------------------|------------------|----|----|-------|
|                              | Allelic model          |                   |                       | Genotype model   |    |       | Allelic model        |                   |                       | Genotype model   |    |    |       |
|                              | A allele carriers      | A allele carriers | G allele non carriers | AA               | GA | GG    | A allele carriers    | A allele carriers | G allele non carriers | AA               | GA | GG |       |
| Age at diagnosis, years      |                        |                   |                       |                  |    |       |                      |                   |                       |                  |    |    |       |
| <50                          | 67                     | 73                | 10                    | 10               | 63 | 67    | 60                   | 80                | 11                    | 129              | 11 | 69 | 60    |
| ≥50                          | 32                     | 30                | 4                     | 4                | 26 | 32    | 26                   | 36                | 3                     | 59               | 3  | 33 | 26    |
| OR (95% CI)                  | 1                      | 1.16 (0.64-2.11)  | 1                     | 0.89 (0.27-2.98) |    |       | 1                    | 0.96 (0.53-1.76)  | 1                     | 0.59 (0.16-2.22) |    |    |       |
| P-value                      |                        | 0.650             |                       | >0.999           |    | 0.942 |                      | >0.999            |                       | 0.557            |    |    | 0.789 |
| Tumour size, cm              |                        |                   |                       |                  |    |       |                      |                   |                       |                  |    |    |       |
| <2                           | 60                     | 70                | 11                    | 11               | 59 | 60    | 58                   | 72                | 11                    | 119              | 11 | 61 | 58    |
| 2-5                          | 39                     | 33                | 3                     | 3                | 30 | 39    | 28                   | 44                | 3                     | 69               | 3  | 41 | 28    |
| OR (95% CI)                  | 1                      | 1.38 (0.77-2.46)  | 1                     | 0.47 (0.13-1.74) |    |       | 1                    | 0.79 (0.44-1.42)  | 1                     | 0.47 (0.13-1.74) |    |    |       |
| P-value                      |                        | 0.305             |                       | 0.387            |    | 0.390 |                      | 0.460             |                       | 0.387            |    |    | 0.317 |
| Lymph node status            |                        |                   |                       |                  |    |       |                      |                   |                       |                  |    |    |       |
| Negative                     | 56                     | 66                | 8                     | 8                | 58 | 56    | 50                   | 72                | 8                     | 114              | 8  | 64 | 50    |
| Positive                     | 43                     | 37                | 6                     | 6                | 31 | 43    | 36                   | 44                | 6                     | 74               | 6  | 38 | 36    |
| OR (95% CI)                  | 1                      | 1.37 (0.78-2.41)  | 1                     | 1.16 (0.39-3.47) |    |       | 1                    | 1.18 (0.67-2.08)  | 1                     | 1.16 (0.39-3.47) |    |    |       |
| P-value                      |                        | 0.315             |                       | 0.785            |    | 0.462 |                      | 0.663             |                       | 0.785            |    |    | 0.808 |
| Differentiation grade        |                        |                   |                       |                  |    |       |                      |                   |                       |                  |    |    |       |
| G1+G2                        | 80                     | 77                | 148                   | 9                | 68 | 80    | 68                   | 89                | 9                     | 148              | 9  | 80 | 68    |
| G3                           | 19                     | 25                | 9                     | 5                | 20 | 19    | 17                   | 27                | 5                     | 39               | 5  | 22 | 17    |
| OR (95% CI)                  | 1                      | 0.73 (0.37-1.44)  | 1                     | 2.11 (0.67-6.65) |    |       | 1                    | 0.82 (0.42-1.63)  | 1                     | 2.11 (0.67-6.65) |    |    |       |
| P-value                      |                        | 0.397             |                       | 0.857            |    | 0.327 |                      | 0.609             |                       | 0.194            |    |    | 0.396 |
| Estrogen receptor status     |                        |                   |                       |                  |    |       |                      |                   |                       |                  |    |    |       |
| Negative                     | 32                     | 32                | 6                     | 6                | 26 | 32    | 24                   | 40                | 5                     | 59               | 5  | 35 | 24    |
| Positive                     | 67                     | 71                | 8                     | 8                | 63 | 67    | 62                   | 76                | 9                     | 129              | 9  | 67 | 62    |
| OR (95% CI)                  | 1                      | 0.94 (0.52-1.71)  | 1                     | 0.59 (0.19-1.79) |    |       | 1                    | 1.36 (0.74-2.49)  | 1                     | 0.82 (0.26-2.56) |    |    |       |
| P-value                      |                        | 0.881             |                       | 0.379            |    | 0.558 |                      | 0.361             |                       | 0.769            |    |    | 0.591 |
| Progesterone receptor status |                        |                   |                       |                  |    |       |                      |                   |                       |                  |    |    |       |
| Negative                     | 42                     | 39                | 7                     | 7                | 32 | 42    | 34                   | 47                | 7                     | 71               | 7  | 40 | 34    |
| Positive                     | 57                     | 64                | 7                     | 7                | 57 | 57    | 52                   | 69                | 7                     | 114              | 7  | 62 | 52    |
| OR (95% CI)                  | 1                      | 0.83 (0.47-1.45)  | 1                     | 0.65 (0.22-1.93) |    |       | 1                    | 1.04 (0.59-1.84)  | 1                     | 0.65 (0.22-1.93) |    |    |       |
| P-value                      |                        | 0.57              |                       | 0.573            |    | 0.489 |                      | >0.999            |                       | 0.573            |    |    | 0.768 |

Table SIV. Continued.

| Parameter                                       | <i>IL-1β</i> rs1143634 |                   |                       |                   | <i>IL-1β</i> rs16944 |    |                |                       |                   |                       |                   |   |    |    |       |
|-------------------------------------------------|------------------------|-------------------|-----------------------|-------------------|----------------------|----|----------------|-----------------------|-------------------|-----------------------|-------------------|---|----|----|-------|
|                                                 | Allelic model          |                   | Genotype model        |                   | Allelic model        |    | Genotype model |                       |                   |                       |                   |   |    |    |       |
|                                                 | A allele non carriers  | A allele carriers | G allele non carriers | G allele carriers | AA                   | GA | GG             | A allele non carriers | A allele carriers | G allele non carriers | G allele carriers |   |    |    |       |
| Human epidermal growth factor receptor 2 status |                        |                   |                       |                   |                      |    |                |                       |                   |                       |                   |   |    |    |       |
| Negative                                        | 77                     | 87                | 10                    | 154               | 10                   | 77 | 77             | 67                    | 97                | 9                     | 155               | 9 | 88 | 67 |       |
| Positive                                        | 22                     | 16                | 4                     | 34                | 4                    | 12 | 22             | 19                    | 19                | 5                     | 33                | 5 | 14 | 19 |       |
| OR (95% CI)                                     | 1                      | 1.55 (0.76-3.17)  | 1                     | 1.81 (0.54-6.12)  |                      |    |                | 1                     | 1.45 (0.71-2.94)  | 1                     | 2.61 (0.82-8.29)  |   | AA | GA | GG    |
| P-value                                         |                        | 0.280             |                       | 0.305             |                      |    |                |                       | 0.363             |                       | 0.146             |   |    |    | 0.086 |

OR, odds ratio.

Table SV. Association between *VEGFA* rs699947 and *VEGFA* rs833061 polymorphisms and clinicopathologic features.

| Parameter                    | VEGFA rs699947    |                       |                   |                  |       |    | VEGFA rs833061        |                   |                       |                   |    |    |       |
|------------------------------|-------------------|-----------------------|-------------------|------------------|-------|----|-----------------------|-------------------|-----------------------|-------------------|----|----|-------|
|                              | Allelic model     |                       |                   | Genotype model   |       |    | Allelic model         |                   |                       | Genotype model    |    |    |       |
|                              | A allele carriers | C allele non carriers | C allele carriers | AA               | CA    | CC | C allele non carriers | C allele carriers | T allele non carriers | T allele carriers | CC | TC | TT    |
| Age at diagnosis, years      |                   |                       |                   |                  |       |    |                       |                   |                       |                   |    |    |       |
| <50                          | 34                | 106                   | 37                | 34               | 69    | 37 | 31                    | 109               | 38                    | 102               | 38 | 71 | 31    |
| ≥50                          | 11                | 51                    | 19                | 11               | 32    | 19 | 12                    | 50                | 18                    | 44                | 18 | 32 | 12    |
| OR (95% CI)                  | 1                 | 0.67 (0.32-1.43)      | 1                 | 1.23 (0.64-2.38) |       |    | 1                     | 0.84 (0.40-1.78)  | 1                     | 1.09 (0.57-2.13)  |    |    |       |
| P-value                      |                   | 0.362                 |                   | 0.610            | 0.570 |    |                       | 0.713             |                       | 0.865             |    |    | 0.901 |
| Tumour size, cm              |                   |                       |                   |                  |       |    |                       |                   |                       |                   |    |    |       |
| <2                           | 32                | 98                    | 36                | 32               | 62    | 36 | 31                    | 99                | 36                    | 94                | 36 | 63 | 31    |
| 2-5                          | 13                | 59                    | 20                | 13               | 39    | 20 | 12                    | 60                | 20                    | 52                | 20 | 40 | 12    |
| OR (95% CI)                  | 1                 | 0.68 (0.33-1.39)      | 1                 | 1.00 (0.53-1.91) |       |    | 1                     | 0.64 (0.31-1.34)  | 1                     | 1.00 (0.53-1.91)  |    |    |       |
| P-value                      |                   | 0.297                 |                   | >0.999           | 0.528 |    |                       | 0.283             |                       | >0.999            |    |    | 0.475 |
| Lymph node status            |                   |                       |                   |                  |       |    |                       |                   |                       |                   |    |    |       |
| Negative                     | 28                | 94                    | 34                | 28               | 60    | 34 | 27                    | 95                | 34                    | 88                | 34 | 61 | 27    |
| Positive                     | 17                | 63                    | 22                | 17               | 41    | 22 | 16                    | 64                | 22                    | 58                | 22 | 42 | 16    |
| OR (95% CI)                  | 1                 | 0.91 (0.46-1.79)      | 1                 | 0.98 (0.52-1.84) |       |    | 1                     | 0.88 (0.44-1.76)  | 1                     | 0.98 (0.52-1.84)  |    |    |       |
| P-value                      |                   | 0.863                 |                   | >0.999           | 0.982 |    |                       | 0.730             |                       | >0.999            |    |    | 0.911 |
| Differentiation grade        |                   |                       |                   |                  |       |    |                       |                   |                       |                   |    |    |       |
| G1+G2                        | 36                | 121                   | 40                | 36               | 81    | 40 | 34                    | 123               | 41                    | 116               | 41 | 82 | 34    |
| G3                           | 9                 | 35                    | 15                | 9                | 20    | 15 | 9                     | 35                | 14                    | 30                | 14 | 21 | 9     |
| OR (95% CI)                  | 1                 | 0.86 (0.38-1.97)      | 1                 | 1.51 (0.74-3.11) |       |    | 1                     | 0.93 (0.41-2.12)  | 1                     | 1.32 (0.64-2.73)  |    |    |       |
| P-value                      |                   | 0.839                 |                   | 0.339            | 0.563 |    |                       | >0.999            |                       | 0.566             |    |    | 0.769 |
| Estrogen receptor status     |                   |                       |                   |                  |       |    |                       |                   |                       |                   |    |    |       |
| Negative                     | 14                | 50                    | 17                | 14               | 33    | 17 | 14                    | 50                | 15                    | 49                | 15 | 35 | 14    |
| Positive                     | 31                | 107                   | 39                | 31               | 68    | 39 | 29                    | 109               | 41                    | 97                | 41 | 68 | 29    |
| OR (95% CI)                  | 1                 | 1.04 (0.51-2.11)      | 1                 | 1.09 (0.56-2.12) |       |    | 1                     | 0.95 (0.46-1.95)  | 1                     | 1.38 (0.69-2.74)  |    |    |       |
| P-value                      |                   | >0.999                |                   | 0.867            | 0.980 |    |                       | >0.999            |                       | 0.401             |    |    | 0.675 |
| Progesterone receptor status |                   |                       |                   |                  |       |    |                       |                   |                       |                   |    |    |       |
| Negative                     | 15                | 66                    | 24                | 24               | 42    | 15 | 15                    | 66                | 22                    | 59                | 22 | 44 | 15    |
| Positive                     | 30                | 91                    | 32                | 32               | 59    | 30 | 28                    | 93                | 34                    | 87                | 34 | 59 | 28    |
| OR (95% CI)                  | 1                 | 1.45 (0.72-2.91)      | 1                 | 0.85 (0.46-1.59) |       |    | 1                     | 1.33 (0.66-2.67)  | 1                     | 1.05 (0.56-1.97)  |    |    |       |
| P-value                      |                   | 0.307                 |                   | 0.634            | 0.575 |    |                       | 0.486             |                       | >0.999            |    |    | 0.662 |





Table SVI. Association between *VEGFA* rs1005230 and *VEGFA* rs25648 polymorphisms and clinicopathological features.

| Parameter                    | VEGFA rs1005230   |                       |                   |                |                  |    | VEGFA rs25648         |                   |                       |                   |     |        |    |
|------------------------------|-------------------|-----------------------|-------------------|----------------|------------------|----|-----------------------|-------------------|-----------------------|-------------------|-----|--------|----|
|                              | Allelic model     |                       |                   | Genotype model |                  |    | Allelic model         |                   |                       | Genotype model    |     |        |    |
|                              | T allele carriers | C allele non carriers | C allele carriers | TT             | CT               | CC | C allele non carriers | C allele carriers | T allele non carriers | T allele carriers | CC  | CT     | TT |
| Age at diagnosis, years      |                   |                       |                   |                |                  |    |                       |                   |                       |                   |     |        |    |
| <50                          | 35                | 38                    | 102               | 38             | 67               | 35 | 2                     | 138               | 96                    | 44                | 96  | 42     | 2  |
| ≥50                          | 11                | 18                    | 44                | 18             | 33               | 11 | 2                     | 60                | 36                    | 26                | 36  | 24     | 2  |
| OR (95% CI)                  | 1                 | 1                     | 1.09 (0.57-2.13)  | 1              | 2.30 (0.32-16.7) | 1  | 1                     | 0.64 (0.34-1.18)  | 1                     | 0.64 (0.34-1.18)  | 1   | 0.241  | 1  |
| P-value                      | 0.281             | 0.865                 |                   | 0.516          |                  |    | 0.588                 |                   |                       | 0.153             |     |        |    |
| Tumour size, cm              |                   |                       |                   |                |                  |    |                       |                   |                       |                   |     |        |    |
| <2                           | 32                | 37                    | 93                | 37             | 61               | 32 | 3                     | 127               | 85                    | 45                | 85  | 42     | 3  |
| 2-5                          | 14                | 19                    | 53                | 19             | 39               | 14 | 1                     | 71                | 47                    | 25                | 47  | 24     | 1  |
| OR (95% CI)                  | 1                 | 1                     | 1.00 (0.47-1.72)  | 1              | 0.59 (0.06-5.84) | 1  | 1                     | 0.99 (0.54-1.82)  | 1                     | 0.99 (0.54-1.82)  | 1   | >0.999 | 1  |
| P-value                      | 0.485             | 0.870                 |                   | 0.573          |                  |    | >0.999                |                   |                       | >0.999            |     |        |    |
| Lymph node status            |                   |                       |                   |                |                  |    |                       |                   |                       |                   |     |        |    |
| Negative                     | 28                | 34                    | 88                | 34             | 60               | 28 | 3                     | 119               | 85                    | 37                | 85  | 34     | 3  |
| Positive                     | 18                | 22                    | 58                | 22             | 40               | 18 | 1                     | 79                | 47                    | 33                | 47  | 32     | 1  |
| OR (95% CI)                  | 1                 | 1                     | 0.98 (0.52-1.84)  | 1              | 0.50 (0.05-4.91) | 1  | 1                     | 0.62 (0.34-1.12)  | 1                     | 0.62 (0.34-1.12)  | 1   | 0.165  | 1  |
| P-value                      | >0.999            | >0.999                |                   | >0.999         |                  |    | >0.999                |                   |                       | 0.131             |     |        |    |
| Differentiation grade        |                   |                       |                   |                |                  |    |                       |                   |                       |                   |     |        |    |
| G1+G2                        | 36                | 40                    | 117               | 40             | 81               | 36 | 2                     | 155               | 105                   | 52                | 105 | 50     | 2  |
| G3                           | 10                | 15                    | 29                | 15             | 19               | 10 | 1                     | 43                | 27                    | 17                | 27  | 16     | 1  |
| OR (95% CI)                  | 1                 | 1                     | 1.51 (0.74-3.11)  | 1              | 1.80 (0.16-20.3) | 1  | 1                     | 1.32 (0.79-1.57)  | 1                     | 1.32 (0.79-1.57)  | 1   | 0.580  | 1  |
| P-value                      | >0.999            | 0.339                 |                   | 0.510          |                  |    | 0.525                 |                   |                       | 0.590             |     |        |    |
| Estrogen receptor status     |                   |                       |                   |                |                  |    |                       |                   |                       |                   |     |        |    |
| Negative                     | 15                | 16                    | 48                | 16             | 33               | 15 | 0                     | 64                | 42                    | 22                | 42  | 22     | 0  |
| Positive                     | 31                | 40                    | 98                | 40             | 67               | 31 | 4                     | 134               | 90                    | 48                | 90  | 44     | 4  |
| OR (95% CI)                  | 1                 | 1                     | 1.22 (0.62-2.40)  | 1              | 0.68 (0.62-0.75) | 1  | 1                     | 0.98 (0.53-1.83)  | 1                     | 0.98 (0.53-1.83)  | 1   | 0.506  | 1  |
| P-value                      | >0.999            | 0.615                 |                   | 0.834          |                  |    | 0.310                 |                   |                       | >0.999            |     |        |    |
| Progesterone receptor status |                   |                       |                   |                |                  |    |                       |                   |                       |                   |     |        |    |
| Negative                     | 17                | 24                    | 57                | 24             | 40               | 17 | 2                     | 79                | 49                    | 32                | 49  | 30     | 2  |
| Positive                     | 29                | 32                    | 89                | 32             | 60               | 29 | 2                     | 119               | 83                    | 38                | 83  | 36     | 2  |
| OR (95% CI)                  | 1                 | 1                     | 0.85 (0.46-1.59)  | 1              | 0.66 (0.09-4.81) | 1  | 1                     | 1.43 (0.79-2.57)  | 1                     | 1.43 (0.79-2.57)  | 1   | 0.479  | 1  |
| P-value                      | 0.733             | 0.634                 |                   | 0.833          |                  |    | >0.999                |                   |                       | 0.291             |     |        |    |
